# Supplementary material
Source: MDPI journal article supplement (https://www.mdpi.com/2305-6290/8/2/50)
Supplement: s1 [file s1]

## Supplementary Tables:

**Table S1:** Verification results of the first planning using the first proposed model

|                    |                  | Kallel et al. [19] | Our work        |
|--------------------|------------------|--------------------|-----------------|
| Objective function |                  | G= 1200 (hours)    | G= 1200 (hours) |
| Response time      |                  | 30.678 seconds     | 33.789 seconds  |
| Decision variables | X <sub>131</sub> | 1                  | 1               |
|                    | X <sub>162</sub> | 1                  | 1               |
|                    | X <sub>221</sub> | 1                  | 1               |
|                    | X <sub>272</sub> | 1                  | 1               |
|                    | X <sub>311</sub> | 1                  | 1               |
|                    | X <sub>352</sub> | 1                  | 1               |
|                    | X <sub>343</sub> | 1                  | 1               |
|                    | F <sub>131</sub> | 140                | 140             |
|                    | F <sub>162</sub> | 171                | 171             |
|                    | F <sub>221</sub> | 184                | 184             |
|                    | F <sub>272</sub> | 251                | 251             |
|                    | F <sub>311</sub> | 53                 | 53              |
|                    | F <sub>352</sub> | 45                 | 45              |
|                    | F <sub>343</sub> | 356                | 356             |
|                    | C <sub>131</sub> | 203                | 203             |
|                    | C <sub>162</sub> | 337                | 337             |
|                    | C <sub>221</sub> | 233                | 233             |
|                    | C <sub>272</sub> | 426                | 426             |
|                    | C <sub>311</sub> | 95                 | 95              |
|                    | C <sub>352</sub> | 196                | 196             |
|                    | C <sub>343</sub> | 459                | 459             |

**Table S2:** Verification results of the second planning using the first proposed model

|                    |                  | Kallel et al. [19] | Our work       |
|--------------------|------------------|--------------------|----------------|
| Objective function |                  | G= 787 (hours)     | G= 787 (hours) |
| Response time      |                  | 0.197 seconds      | 0.224 seconds  |
| Decision Variables | X <sub>121</sub> | 1                  | 1              |
|                    | X <sub>211</sub> | 1                  | 1              |
|                    | X <sub>331</sub> | 1                  | 1              |
|                    | X <sub>342</sub> | 1                  | 1              |
|                    | F <sub>121</sub> | 235                | 235            |
|                    | F <sub>211</sub> | 262                | 262            |
|                    | F <sub>331</sub> | 142                | 142            |
|                    | F <sub>342</sub> | 148                | 148            |
|                    | C <sub>121</sub> | 203                | 203            |
|                    | C <sub>211</sub> | 337                | 337            |
|                    | C <sub>331</sub> | 233                | 233            |
|                    | C <sub>342</sub> | 426                | 426            |

**Table S3:** Verification results of the third planning from 20/12/2016 to 31/12/2016 using the first proposed model

|                    |                  | Kallel et al. [19] | Our Work       |
|--------------------|------------------|--------------------|----------------|
| Objective function |                  | G= 631 (hours)     | G= 631 (hours) |
| Response time      |                  | 0.061 seconds      | 0.067 seconds  |
| Decision Variables | X <sub>111</sub> | 1                  | 1              |
|                    | X <sub>221</sub> | 1                  | 1              |
|                    | X <sub>331</sub> | 1                  | 1              |
|                    | F <sub>111</sub> | 258                | 258            |
|                    | F <sub>221</sub> | 190                | 190            |
|                    | F <sub>331</sub> | 183                | 183            |
|                    | C <sub>111</sub> | 266                | 266            |
|                    | C <sub>221</sub> | 201                | 201            |
|                    | C <sub>331</sub> | 232                | 232            |

**Table S4:** Verification results of the first planning from 1/12/2016 to 10/12/2016 using the second proposed model

|                    |                 | Kallel et al. [19] | Our Work      |
|--------------------|-----------------|--------------------|---------------|
| Objective Function |                 | H= 38447 (minutes) | H= 28835.25   |
| Resolution time    |                 | 0.059 seconds      | 1.003 seconds |
| Decision Variables | Y <sub>11</sub> | 1                  | 1             |
|                    | Y <sub>26</sub> | 1                  | 1             |
|                    | Y <sub>35</sub> | 1                  | 1             |
|                    | Y <sub>42</sub> | 1                  | 1             |
|                    | Y <sub>51</sub> | 1                  | 1             |
|                    | Y <sub>66</sub> | 1                  | 1             |
|                    | Y <sub>76</sub> | 1                  | 1             |
|                    | C <sub>11</sub> | 0                  | 0             |
|                    | C <sub>26</sub> | 650                | 650           |
|                    | C <sub>35</sub> | 525                | 525           |
|                    | C <sub>42</sub> | 660                | 660           |
|                    | C <sub>51</sub> | 168                | 168           |
|                    | C <sub>66</sub> | 255                | 255           |
|                    | C <sub>76</sub> | 632                | 632           |

**Table S5:** Verification results of the second planning from 11/12/2016 to 20/12/2016 using the second proposed model

|                    |                 | Kallel et al. [19] | Our work      |
|--------------------|-----------------|--------------------|---------------|
| Objective Function |                 | H= 23747 (minutes) | H= 17810.25   |
| Resolution time    |                 | 0.045 seconds      | 0.985 seconds |
| Decision Variables | Y <sub>13</sub> | 1                  | 1             |
|                    | Y <sub>26</sub> | 1                  | 1             |
|                    | Y <sub>31</sub> | 1                  | 1             |
|                    | Y <sub>44</sub> | 1                  | 1             |
|                    | C <sub>13</sub> | 386                | 386           |
|                    | C <sub>26</sub> | 655                | 655           |
|                    | C <sub>31</sub> | 72                 | 72            |
|                    | C <sub>44</sub> | 658                | 658           |

**Table S6:** Verification results of the third planning from 21/12/2016 to 31/12/2016 using the second proposed model

|                    |                 | Kallel et al. [19] | Our work      |
|--------------------|-----------------|--------------------|---------------|
| Objective Function |                 | H= 19516 (minutes) | H= 14637      |
| Resolution Time    |                 | 0.043 seconds      | 0.871 seconds |
| Decision Variables | Y <sub>26</sub> | 1                  | 1             |
|                    | Y <sub>16</sub> | 1                  | 1             |
|                    | Y <sub>17</sub> | 1                  | 1             |
|                    | Y <sub>32</sub> | 1                  | 1             |
|                    | Y <sub>34</sub> | 1                  | 1             |
|                    | C <sub>26</sub> | 137                | 137           |
|                    | C <sub>16</sub> | 22                 | 22            |
|                    | C <sub>17</sub> | 586                | 586           |
|                    | C <sub>32</sub> | 527                | 527           |
|                    | C <sub>34</sub> | 168                | 168           |
|                    | Z <sub>16</sub> | 22                 | 22            |
|                    | Z <sub>17</sub> | 586                | 586           |
|                    | Z <sub>32</sub> | 527                | 527           |
|                    | Z <sub>34</sub> | 168                | 168           |
